# Supplementary material for: Teaching a neural network to attach and detach electrons from molecules
Source: PubMed Central journal article supplement (PMC8357920; doi:10.1038/s41467-021-24904-0), 2021-08-11
Supplement: 41467_2021_24904_MOESM1_ESM.pdf [file 41467_2021_24904_MOESM1_ESM.pdf]

Supplementary Materials for

Teaching neural network to attach and detach electrons from molecules

*Roman Zubatyuk, Justin S. Smith, Benjamin T. Nebgen, Sergei Tretiak, Olexandr Isayev\**

\*Corresponding author. Email: [olexandr@olexandrisayev.com](mailto:olexandr@olexandrisayev.com)

This PDF file includes:

Supplementary Table 1: Number of molecules and conformers in training and test datasets.

Supplementary Figure 1: Distribution of molecule sizes in training and test datasets.

Supplementary Figure 2: Distribution of molecular energies for training and test datasets.

Supplementary Table 2: Root mean square errors (RMSEs) for atomic partial charge (DFT/MBIS) prediction for individual models and ensemble of 5 models (ens5) on Ions-12 test set and Ions-16 external set.

Supplementary Note 1: Loss function for the AIMNet models training.

Supplementary Figure 3: Correlation plots for predicted versus DFT total molecular energies for Ions-16 dataset.

Supplementary Figure 4: Correlation plots for predicted versus DFT ionization potentials (IP) and electron attachment energies (EA) for Ions-16 dataset.

Supplementary Figure 5: Correlation plots for predicted versus DFT MBIS partial atomic charges for Ions-16 dataset.

Supplementary Table 1: Number of molecules and conformers in training and test datasets.

|                   | Cations   | Neutrals  | Anions    |
|-------------------|-----------|-----------|-----------|
| <b>Molecules</b>  |           |           |           |
| Ions-12           | 154,381   | 167,103   | 155,981   |
| Ions-16           | 13,607    | 16,138    | 13,860    |
| <b>Conformers</b> |           |           |           |
| Ions-12           | 1,896,354 | 3,273,755 | 2,150,019 |
| Ions-16           | 75,654    | 148,543   | 85,741    |

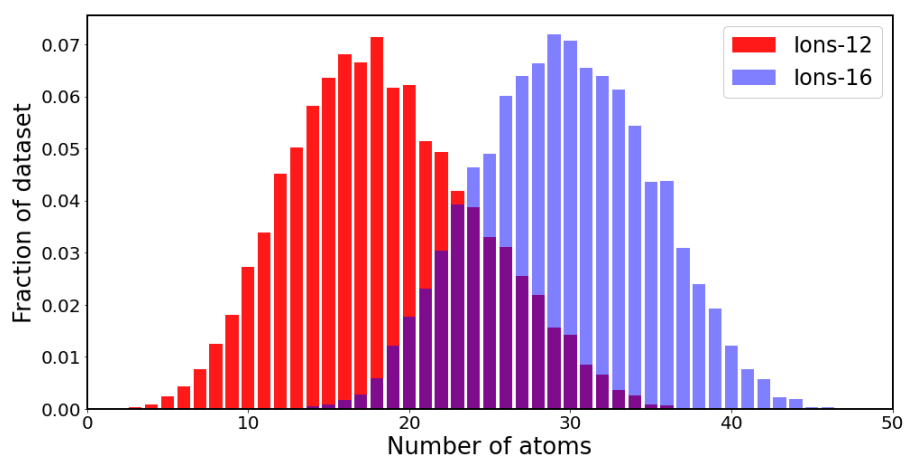

Supplementary Figure 1: Distribution of molecule sizes in training and test datasets.

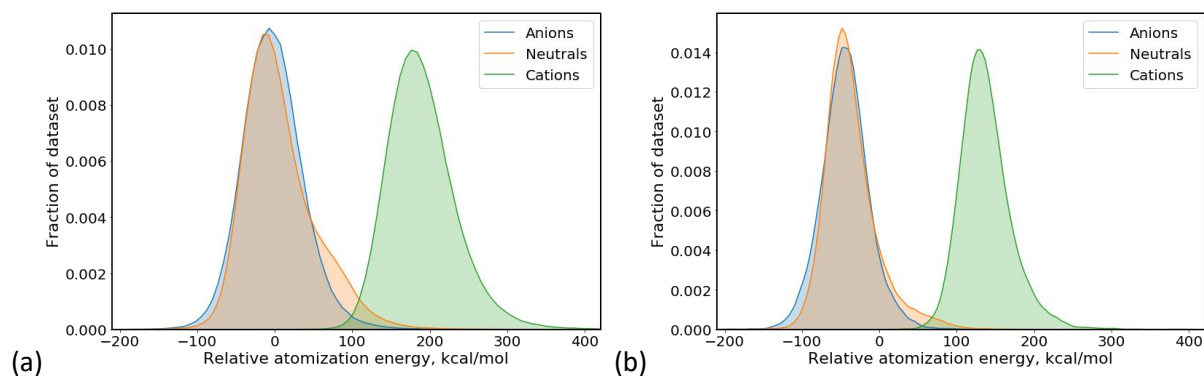

Supplementary Figure 2: Distribution of molecular energies for training and test datasets. Atomization energy defined as total DFT energy minus sum of atomic energies computed as average in the dataset.

Supplementary Table 2: Root mean square errors (RMSEs) for atomic partial charge (DFT/NBO) prediction for individual models and ensemble of 5 models (ens5) on lons-12 test set and lons-16 external set.

| Model      | Test Dataset     | Partial charge RMSE |         |       |
|------------|------------------|---------------------|---------|-------|
|            |                  | Cation              | Neutral | Anion |
| AIMNet     | lons-12          | 0.028               | 0.017   | 0.026 |
|            | lons-16          | 0.028               | 0.013   | 0.021 |
|            | lons-16 (ens5)   | 0.026               | 0.011   | 0.019 |
|            | ChEMBL-20 (ens5) | 0.031               | 0.016   | 0.042 |
| AIMNet-MT  | lons-12          | 0.025               | 0.016   | 0.027 |
|            | lons-16          | 0.024               | 0.013   | 0.022 |
|            | lons-16 (ens5)   | 0.023               | 0.011   | 0.020 |
|            | ChEMBL-20 (ens5) | 0.028               | 0.016   | 0.040 |
| AIMNet-NSE | lons-12          | 0.025               | 0.016   | 0.025 |
|            | lons-16          | 0.024               | 0.013   | 0.021 |
|            | lons-16 (ens5)   | 0.022               | 0.011   | 0.019 |
|            | ChEMBL-20 (ens5) | 0.027               | 0.016   | 0.038 |

### Supplementary Note 1: Loss function for the AIMNet models training.

The training objective was minimization of weighted multi-target mean squared error (MSE) loss function. For a molecule with N atoms it could be written as:

$$\mathcal{L} = \sum_{t=1}^T w_t (\mathcal{L}_E + w_q \mathcal{L}_q + w_{\tilde{q}} \mathcal{L}_{\tilde{q}}) \quad (\text{S1})$$

$$\mathcal{L}_E = \frac{1}{N} (E - \hat{E})^2 \quad (\text{S2})$$

$$\mathcal{L}_q = \frac{1}{2N} \sum_{i=1}^N \sum_{s \in \{\alpha, \beta\}} (q_i^s - \hat{q}_i^s)^2 \quad (\text{S3})$$

$$\mathcal{L}_{\tilde{q}} = \frac{1}{2N} \sum_{i=1}^N \sum_{s \in \{\alpha, \beta\}} (\hat{q}_i^s - \tilde{q}_i^s)^2 \quad (\text{S3})$$

The loss functions include the weighted contributions from total energy prediction error  $\mathcal{L}_E$  and spin-charges prediction error  $\mathcal{L}_q$ . For AIMNet-NSE we added squared difference between of predicted charges before and after normalization procedure (Eq. 4), to ensure that un-normalized charges are close to the normalized charges. For all AIMNet models, contributions from several “SCF-like” passes were included into the total loss with weights  $w_t$ . The weights  $w_q$  and  $w_{\tilde{q}}$  were selected as 90 and 30 kcal mol<sup>-1</sup> e<sup>-1</sup> such as all energy and charges errors give approximately equal contributions to the loss function.

The models were trained with 3 passes, the outputs from each pass were included into weight function with weights  $w_t=[0.15, 0.25, 0.60]$  for AIMNet and AIMNet-MT and  $w_t=[0, 0.3, 0.7]$  for AIMNet-NSE.

Our experiments show that the final results are virtually the same regardless the choice of weights in the loss function.

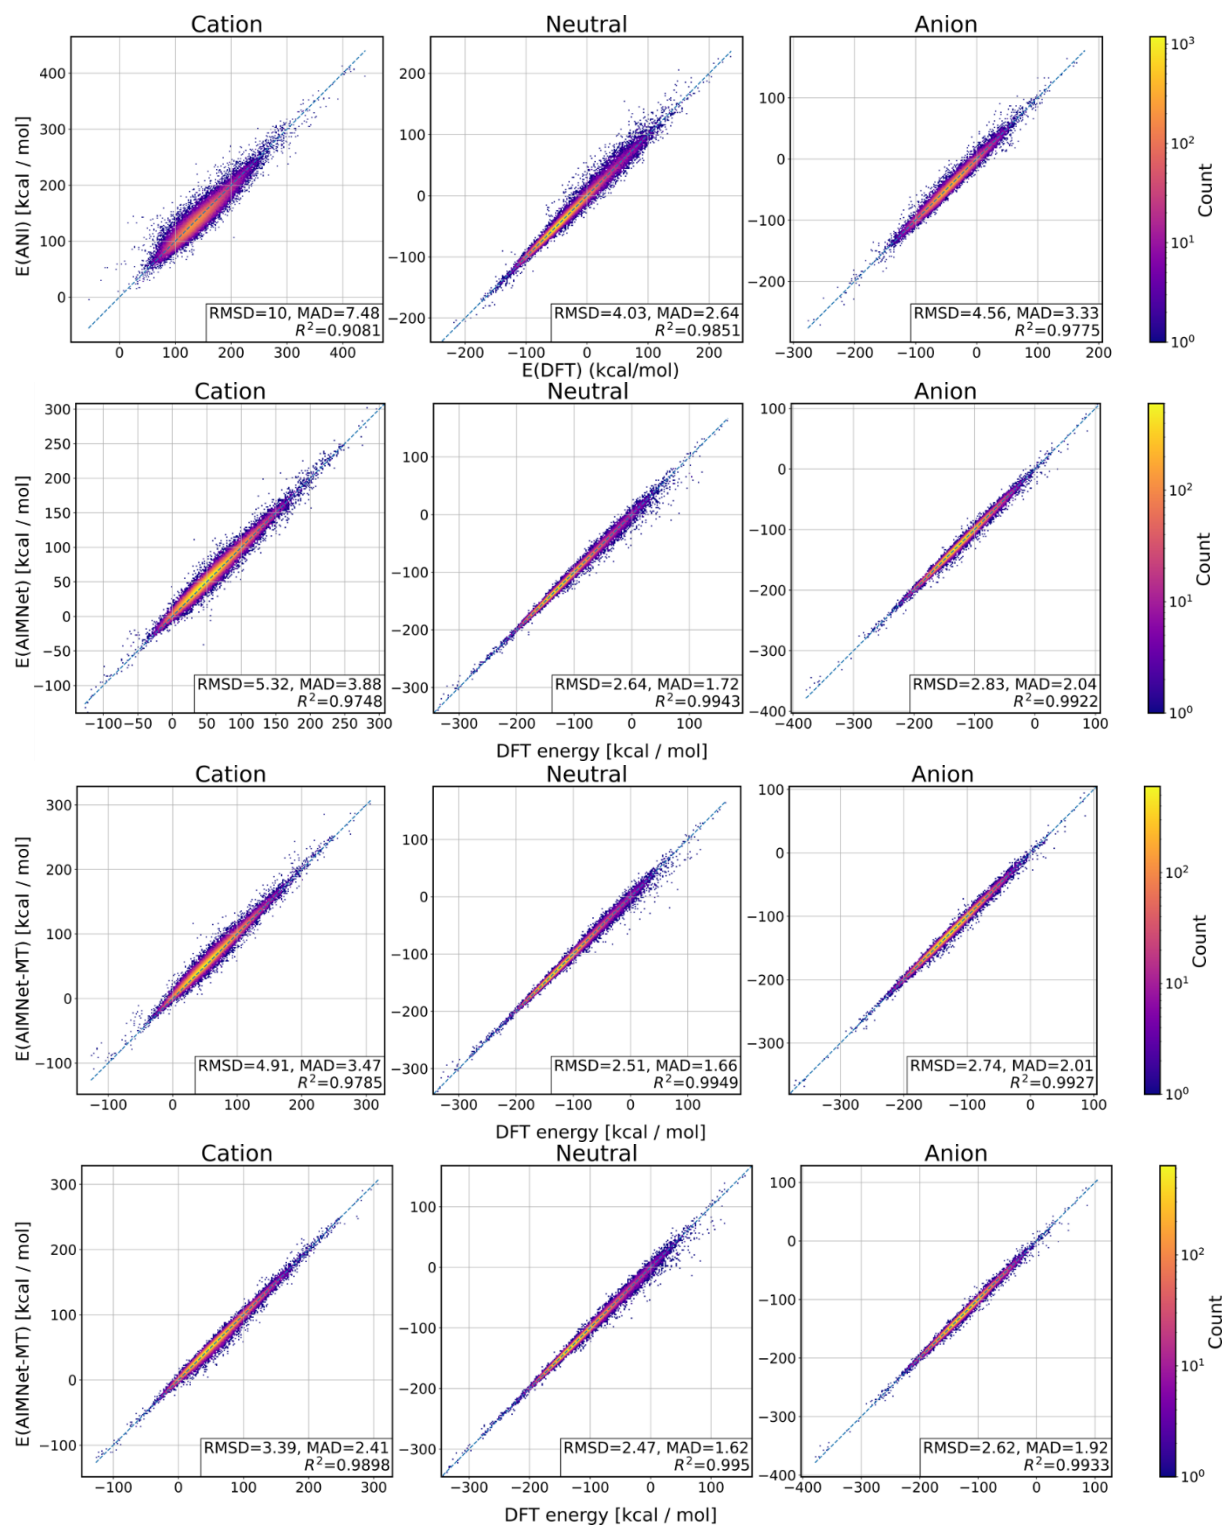

Supplementary Figure 3: Correlation plots for predicted versus DFT total molecular energies for Ions-16 dataset.

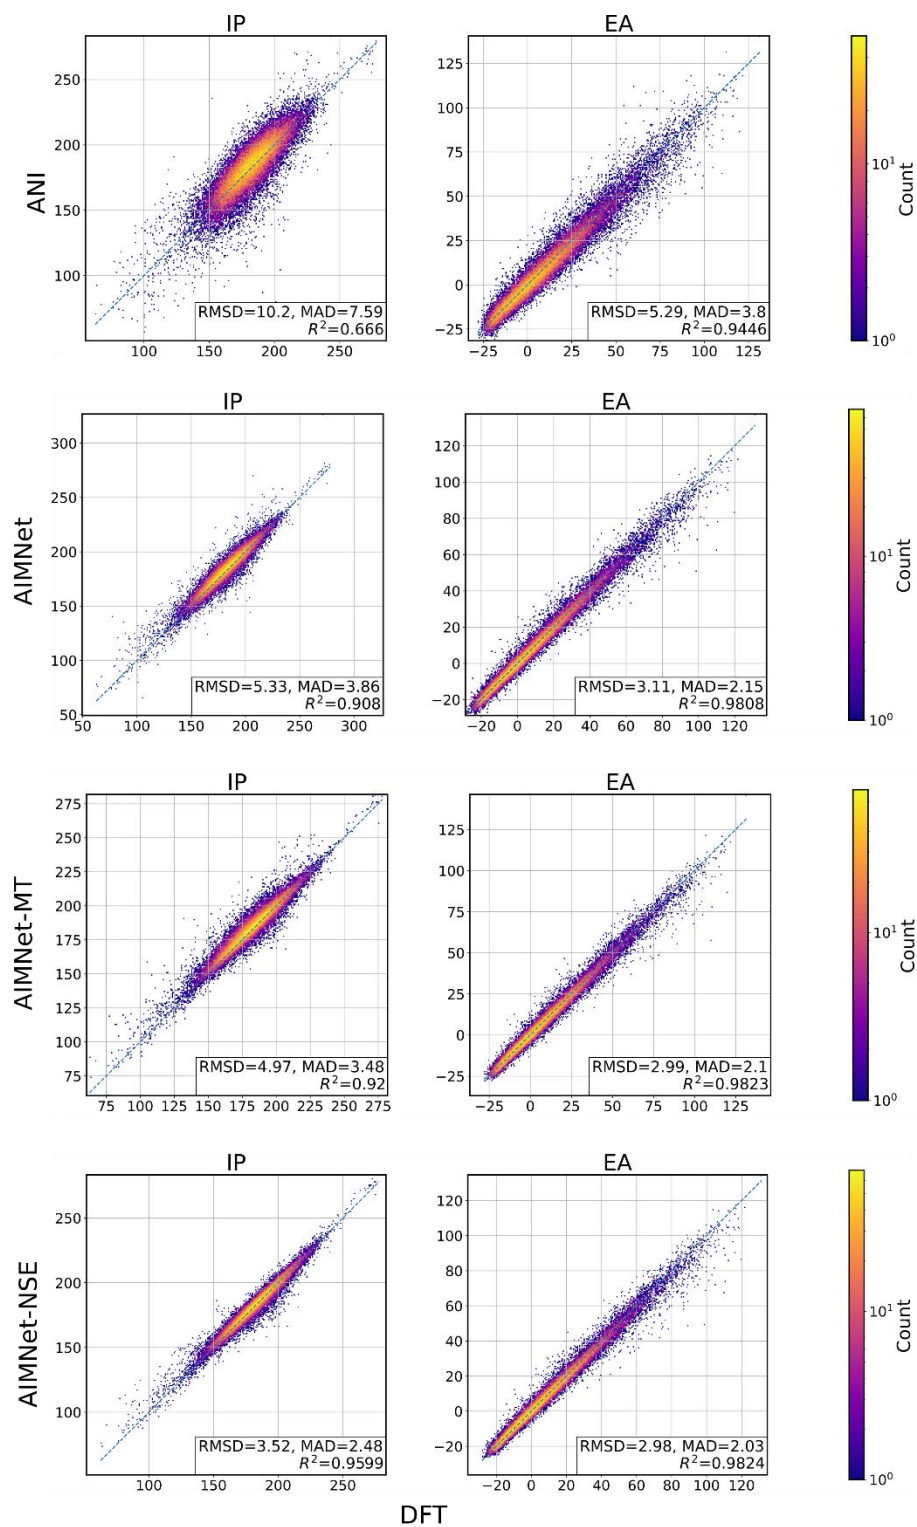

Supplementary Figure 4: Correlation plots for predicted versus DFT ionization potentials (IP) and electron attachment energies (EA) [kcal/mol] for Ions-16 dataset.

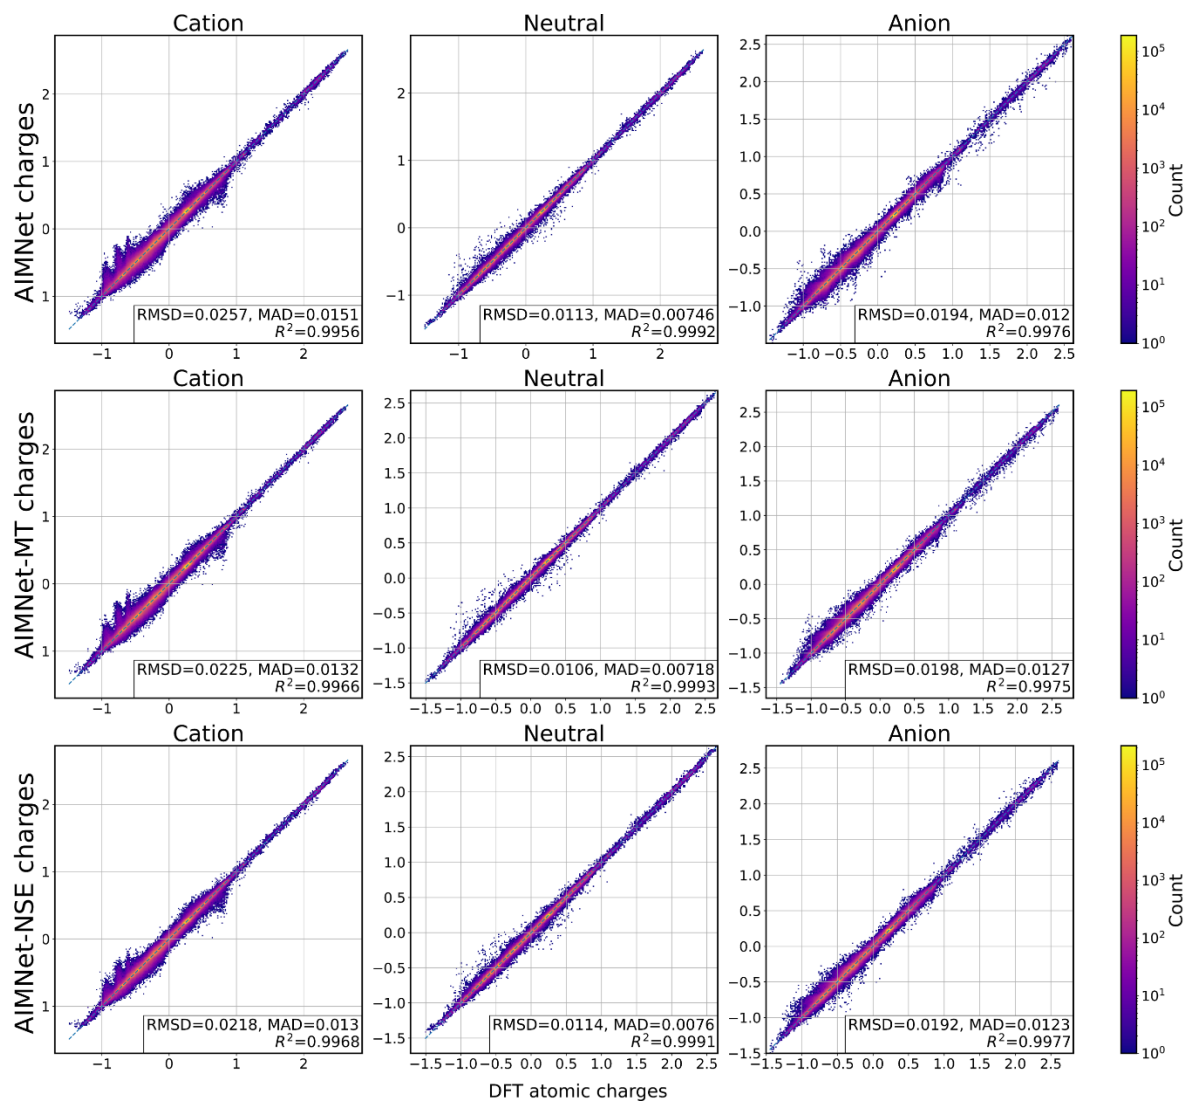

Supplementary Figure 5: Correlation plots for predicted versus DFT NBO partial atomic charges for Ions-16 dataset.
